# Supplementary material for: Prognostic Value of Comorbidity for Patients with Upper Tract Urothelial Carcinoma after Radical Nephroureterectomy
Source: MDPI journal article supplement (doi:10.3390/cancers14061466), 2022-03-12
Supplement: s1 [file s1]

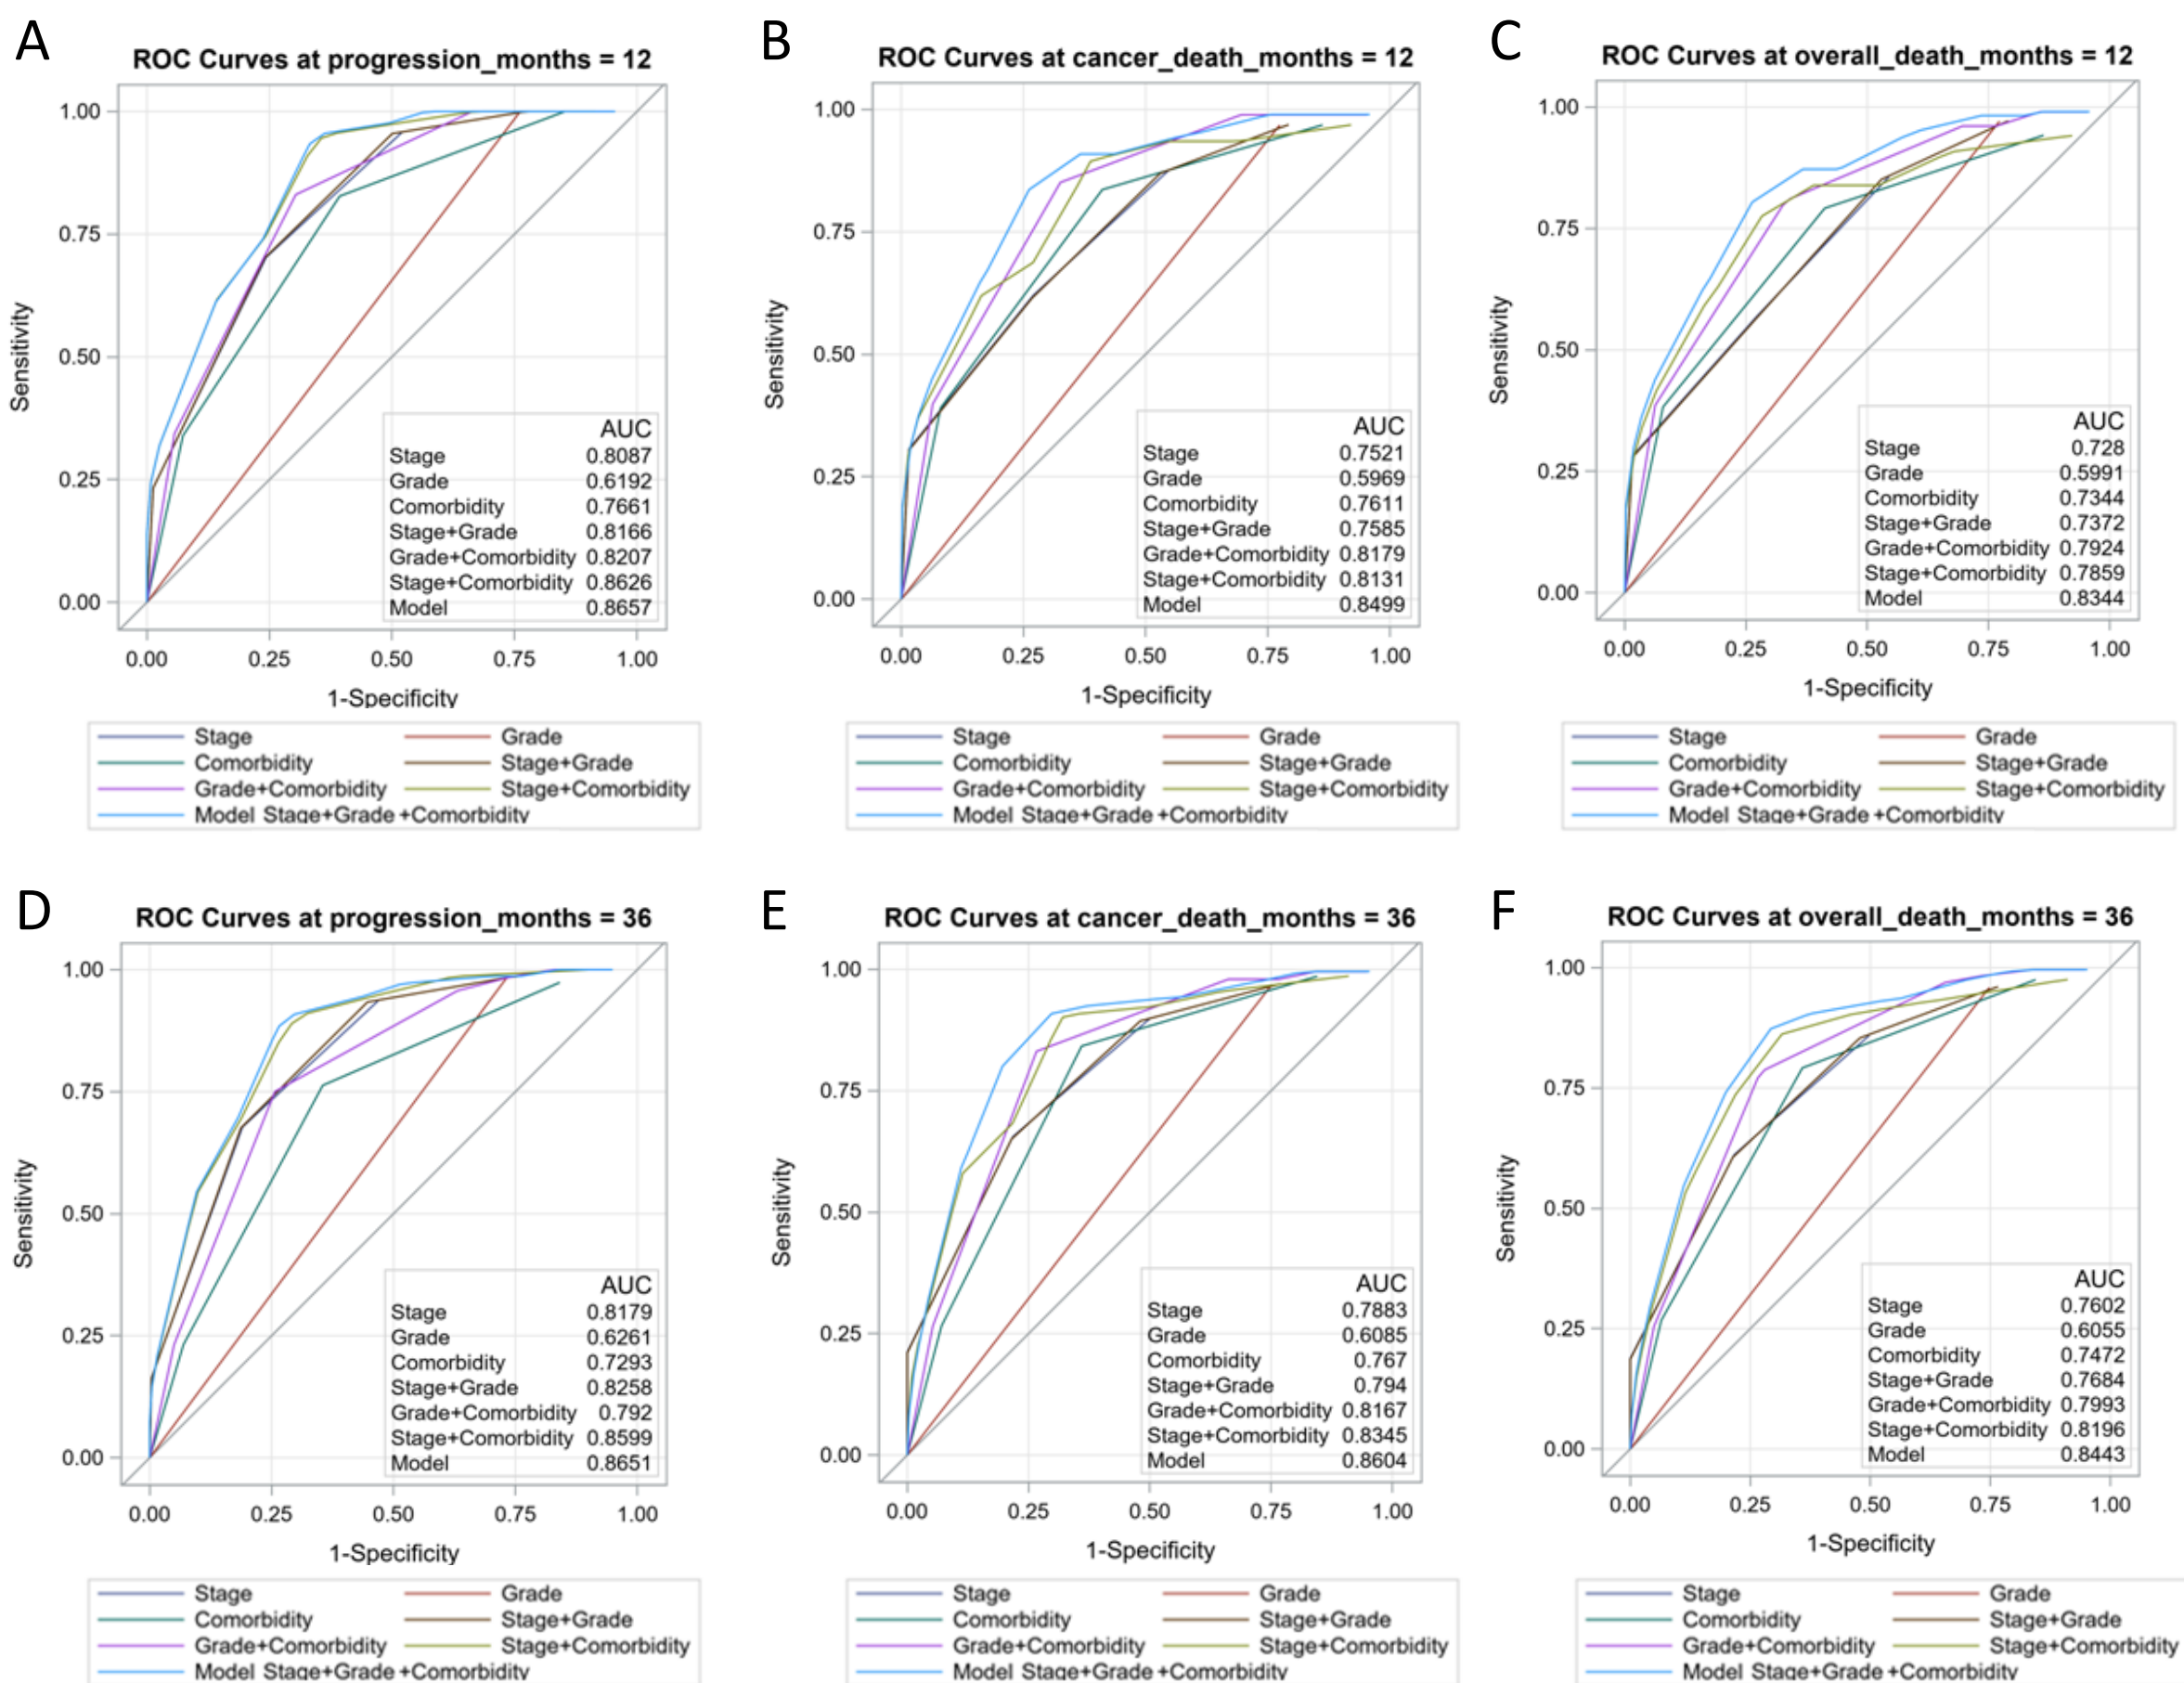

**Figure S1.** Receiver operator characteristic (ROC) analysis of seven models for predicting progression-free survival, cancer-specific survival and overall survival at 1 year (A,B,C) and 3 years (D,E,F).
